## Expression of transforming growth factor $\beta 2$ RNA during murine embryogenesis

RON W. PELTON, SHINTARO NOMURA\*, HAROLD L. MOSES and BRIGID L. M. HOGAN

Department of Cell Biology, Vanderbilt School of Medicine, Nashville, TN 37232, USA

\* Present address: Institute of Applied Microbiology, University of Tokyo, Tokyo, Japan

### Summary

We have studied the temporal and spatial expression of transforming growth factor  $\beta 2$  (TGF $\beta 2$ ) RNA in mouse embryos from 10.5 days *post coitum* (*p.c.*) to 3 days *post partum* (*p.p.*) by *in situ* hybridization analysis. TGF $\beta 2$  RNA is expressed in a variety of tissues including bone, cartilage, tendon, gut, blood vessels, skin and fetal placenta, and is in general found in the mesenchymal

component of these tissues. The expression of TGF $\beta 2$  RNA changes during development in a manner consistent with a role for the gene product in mediating mesenchymal–epithelial interactions.

Key words: TGF $\beta$  family, TGF $\beta 2$ , *in situ* hybridization, mouse development, mesenchyme.

### Introduction

The participation of polypeptide growth factors in mammalian embryonic development is well documented. For example, a variety of growth factors such as EGF, IGF, TGF $\alpha$ , and TGF $\beta$  as well as their receptors have been detected in embryonic cell lines and embryonic tissues (Proper *et al.* 1982; Twardzik, 1985; Nexo *et al.* 1980; Adamson *et al.* 1981; Moses *et al.* 1980; D'Ercole *et al.* 1980; Heath & Shi, 1986; Smith *et al.* 1987; Pfeilshifter & Mundy, 1987; Twardzik *et al.* 1982). Moreover, sequence and structural similarities have been found between these growth-related molecules and proteins such as Müllerian inhibiting substance, the gene products of *lin-12*, *Notch*, *decapentaplegic*, *Vg-1* and others which had been independently identified by virtue of their effects during embryonic development (Greenwald, 1985; Jakobovits *et al.* 1986; Knust *et al.* 1987; Mason *et al.* 1985; Padgett *et al.* 1987; Wharton *et al.* 1985; Weeks & Melton, 1987; Cate *et al.* 1986). Although it is not surprising to find growth factors present in an embryonic organism which is undergoing rapid cellular proliferation, evidence is now mounting that these peptide growth factors may be important in the regulation of cell differentiation and tissue morphogenesis as well as the control of cell division. This is perhaps best illustrated by transforming growth factor- $\beta 1$  (TGF $\beta 1$ ) and its related family of proteins which have a multiplicity of cellular effects. In this paper, we begin to address the question of function in mouse development of one of these TGF $\beta$ -related peptides, TGF $\beta 2$ .

The beta type transforming growth factors (TGF $\beta$ s) are a family of polypeptides with a wide range of regulatory activities. Members include TGF $\beta 1$  (Derynck *et al.* 1985), TGF $\beta 2$  (Madisen *et al.* 1988), TGF $\beta 3$  (ten Dijke *et al.* 1988; Derynck *et al.* 1988) and TGF $\beta 4$  (Jakowlew *et al.* 1988), as well as more distantly related proteins such as Müllerian inhibiting substance (Cate *et al.* 1986), the inhibins and activins (Mason *et al.* 1985), the *Drosophila decapentaplegic* gene product (Padgett *et al.* 1987), the *Xenopus Vg-1* gene product (Weeks & Melton, 1987), the bone morphogenetic proteins BMP-2A, BMP-2B, and BMP-3 (Wozney *et al.* 1988) and the gene product of the recently described *vgr-1* (Lyons, K. *et al.* 1989). The protein now called TGF $\beta 1$  was the first member of the TGF $\beta$  superfamily to be isolated and characterized. Therefore, as subsequent members were discovered, their sequence similarity was reported relative to TGF $\beta 1$ . Sequence analysis shows that, within the TGF $\beta$  superfamily, the amino acid identity of the distantly related group relative to TGF $\beta 1$  ranges from 28% to 38%, while the closely related group shows a range of 65%–80%. At least 7 of 9 cysteine residues are conserved in all members of the TGF $\beta$  superfamily and the highest level of amino acid sequence identity is, in general, found at the C-terminal end of the molecules (for a review on the structure of the TGF $\beta$  family proteins see Massagué, 1987; Derynck *et al.* 1988). TGF $\beta 1$  is synthesized in an inactive precursor form and is proteolytically cleaved to release the mature (C-terminal) peptide (Gentry *et al.* 1988) which remains noncovalently associated with the amino-terminal peptide in an inactive complex. This

latent peptide is then activated to give mature biologically active protein (Lyons, R. *et al.* 1988; 1989). Sequence data and other experiments suggest that TGF $\beta$ 2 is processed in the same manner (Madisen *et al.* 1988). The activins and inhibins are also cleaved from a larger precursor but it is not yet known if cleavage and activation occurs in the other members of the TGF $\beta$  family.

TGF $\beta$ 1 is synthesized and secreted by many different cells in culture and, although it is found in varying amounts in almost every tissue, highest levels are found in platelets and bone (for a more comprehensive review of TGF $\beta$ 1's distribution and biological activities see Barnard *et al.* 1988; Rizzino, 1988; Sporn *et al.* 1987). Its effects *in vitro* include many actions that are thought to play an important role in embryogenesis. These include: 1) mitogenic effects on supporting tissues such as bone, cartilage and connective tissue fibroblasts, 2) inhibition of cell proliferation, in particular of epithelial cells, 3) regulation of differentiation (positive or negative depending on the cell type) and 4) stimulation of expression of extracellular matrix genes and of the integrin class of matrix protein receptors. TGF $\beta$ 1 has been reported to induce mesoderm formation either alone on isolated *Triturus* ectoderm or synergistically with bFGF in excised *Xenopus* animal hemisphere cells (Knöchel *et al.* 1987; Kimelman & Kirschner, 1987). In addition, TGF $\beta$ 1 has been isolated from mouse cells of embryonic origin both *in vitro* and *in vivo* (Proper *et al.* 1982; Twardzik *et al.* 1982). Consistent with these findings is the localization of TGF $\beta$ 1 receptors on differentiated, but not undifferentiated, murine embryonal carcinoma cells (Rizzino, 1987). Lastly, recent reports using immunohistochemical techniques as well as *in situ* hybridization have localized TGF $\beta$ 1 protein and mRNA to specific areas of the developing mouse embryo (Heine *et al.* 1987; Lehnert & Akhurst, 1988; Wilcox & Derynck, 1988; Sandberg *et al.* 1988a,b).

In contrast to the abundant evidence for a role for TGF $\beta$ 1 in embryonic development, relatively few data are available linking the other closely related members of this gene family to developmental processes. TGF $\beta$ 3 and TGF $\beta$ 4 mRNAs are abundant in embryonic chicken chondrocytes suggesting a role for these molecules in chicken skeletal development (Jakowlew *et al.* 1988a,b). TGF $\beta$ 2 (originally called BSC-1 growth inhibitor) was first isolated from the simian kidney epithelial cell line, BSC-1, by virtue of its growth inhibitory effects on these same cells (Holley *et al.* 1980, 1983). It was subsequently shown to have biological activity similar to TGF $\beta$ 1 (Tucker *et al.* 1984). Molecular cloning of the growth inhibitor mRNA revealed that the putative translation product has very high amino acid sequence identity to TGF $\beta$ 1 (Hanks *et al.* 1988) and it appears from sequence analysis that TGF $\beta$ 2 protein is processed to a mature form very much like TGF $\beta$ 1 (Madisen *et al.* 1988). TGF $\beta$ 2 has also been isolated from other cell types including a human prostatic adenocarcinoma, a human glioblastoma, porcine platelets, and bovine bone (Madisen *et al.* 1988; Ikeda *et al.* 1987; Marquardt *et al.* 1987; Wrann *et al.* 1987; de

Martin *et al.* 1987; Seyedin *et al.* 1987). When TGF $\beta$ 2 was first isolated from bovine bone, it was named cartilage-inducing factor-B (CIF-B), and was shown to have the ability to induce fetal rat muscle mesenchymal cells to express a cartilage phenotype *in vitro* (Seyedin *et al.* 1987). Although TGF $\beta$ 1 and TGF $\beta$ 2 have similar functions in most *in vitro* systems, TGF $\beta$ 2 appears to be much more effective in the induction of mesoderm in isolated animal pole explants of the *Xenopus* blastula. At levels of 3–12 ng ml<sup>-1</sup>, TGF $\beta$ 2 induces the expression of  $\alpha$ -actin (a marker for muscle, a dorsal mesoderm-derived tissue) and induces the animal caps to form elongated structures similar to those arising from the marginal zone (Rosa *et al.* 1988). In addition, medium conditioned by *Xenopus* XTC cells contains a mesoderm-inducing factor (MIF) (Smith, 1987), the activity of which can be blocked by antibodies to porcine TGF $\beta$ 2 (Rosa *et al.* 1988). The specific relationship of the XTC MIF to TGF $\beta$ 2, however, remains to be determined (Smith, 1989).

Preliminary to defining a more precise role of TGF $\beta$ 2 in mouse embryogenesis, we have determined the spatial and temporal localization of TGF $\beta$ 2 transcripts in the developing mouse embryo. In this paper, we report studies on the expression of TGF $\beta$ 2 mRNA in later stage embryos as revealed by *in situ* hybridization analysis. The pattern of gene expression observed is consistent with a role for TGF $\beta$ 2 in tissue morphogenesis, in particular in regions of the mesenchyme where extracellular matrix production and angiogenesis are taking place. The pattern is also consistent with a role for TGF $\beta$ 2 in mesenchymal–epithelial tissue interactions during development.

## Materials and methods

### Mouse embryos

All embryos were obtained from ICR outbred females mated with (C57Bl  $\times$  DBA) F<sub>1</sub> males (Harlan Sprague Dawley). Noon on the day of vaginal plug is 0.5 day *post coitum*.

### Probe construction

A 2.6 kb cDNA clone (pPC-21) covering the entire coding region as well as both 5' and 3' regions of the human TGF $\beta$ 2 gene was kindly provided by Dr A. F. Purchio of Oncogene (Madisen *et al.* 1988). In order to minimize the possibility of cross-hybridization of our hTGF $\beta$ 2 probe with any of the other TGF $\beta$ s, we chose a 929 bp *EcoRI*–*HindIII* fragment which eliminates the 3' terminal (mature) region of the cDNA (the region of highest sequence conservation in the TGF $\beta$  family). This fragment contains 179 b.p. of 5' noncoding as well as 750 b.p. of precursor coding region. Our cDNA probe shows 85% nucleotide sequence identity to the murine TGF $\beta$ 2 gene (isolated since the completion of these studies; Miller *et al.* 1989), but only 42% sequence identity to the murine TGF $\beta$ 1 gene (Derynck *et al.* 1986), and 53% sequence identity to the murine TGF $\beta$ 3 gene (D. Miller, personal communication). The 929 b.p. fragment was subcloned into a Bluescript vector (Stratagene, La Jolla, CA) and [ $\alpha$ -<sup>35</sup>S] UTP (1400 Ci mm<sup>-1</sup>, New England Nuclear)-labeled single-stranded sense and antisense RNA probes (specific activity 2.2  $\times$  10<sup>9</sup> disintegrations min<sup>-1</sup>  $\mu$ g<sup>-1</sup> RNA) were prepared using either

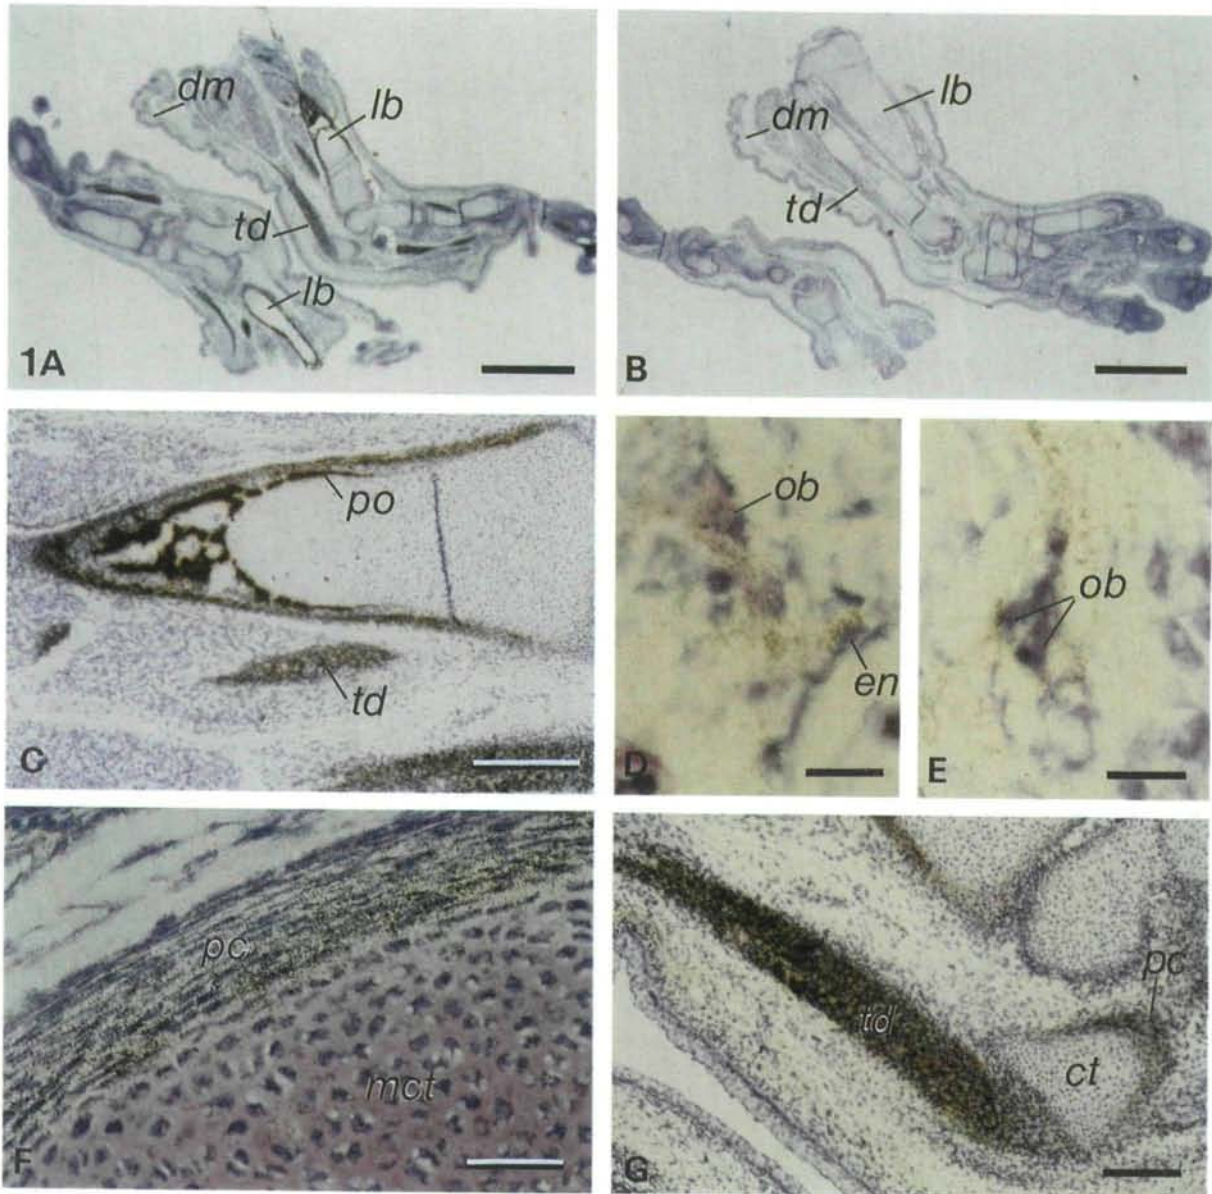

**Fig. 1.** Expression of TGF $\beta$ 2 RNA in the embryonic skeletal system. (A) Longitudinal section through limbs of a 15.5 days *p.c.* embryo hybridized with antisense probe. Strong hybridization is seen in the long bones, perichondrium, and tendon. Hybridization can also be seen in the dermis of the skin. Bar = 1 mm. (B) Adjacent section to A, hybridized with sense strand (control) probe. Bar = 1 mm. (C) Higher magnification of the long bone seen in A, showing the TGF $\beta$ 2 signal in the periosteum and in the central region of the bone. Strong hybridization is also seen in tendon. Bar = 250  $\mu$ m. (D) High magnification of the hybridizing cells in the central region of the long bone seen in A and C, showing highest grain density over osteoblasts and endothelial-like cells. Bar = 2.5  $\mu$ m. (E) High magnification of the strongly hybridizing cells in the periosteum of the long bone seen in A and C, showing highest grain density over the presumptive osteoblasts. Bar = 2.5  $\mu$ m. (F) Section through embryonic cartilage of a 16.5 days *p.c.* embryo showing strong hybridization in the cells of the perichondrium but not in the mature cartilage. Bar = 100  $\mu$ m. (G) High magnification of the tendon seen in A showing high grain density in the fibroblast population. This level of hybridization abruptly stops as the tendon inserts into the cartilage. Hybridization is also seen in the perichondrium of several cartilage elements. Bar = 150  $\mu$ m. Sections were exposed for 5–7 days. *lb*, long bone; *td*, tendon; *ob*, osteoblast; *en*, endothelial-like cell; *po*, periosteum; *pc*, perichondrium; *mct*, mature cartilage; *ct*, cartilage; *dm*, dermis.

T3 or T7 polymerase, essentially as described by Hogan *et al.* (1986). Northern blot analysis with this probe revealed that it recognizes the same transcripts as the murine TGF $\beta$ 2 (Miller *et al.* 1989) and does not cross-hybridize with mTGF $\beta$ 1 or mTGF $\beta$ 3 (data not shown). In addition, comparison of our hTGF $\beta$ 2 probe against the mTGF $\beta$ 2 as revealed by *in situ* hybridization analysis demonstrates that these probes recognize the same RNA species (data not shown). For *in situ* analysis, these probes were reduced to an average size of 100–150 bases by limited alkaline hydrolysis (Cox *et al.* 1984) and were used for hybridization at a final concentration of  $2 \times 10^5$  disints  $\text{min}^{-1} \mu\text{l}^{-1}$ .

### In situ hybridization analysis

*In situ* hybridizations were performed essentially as described by Nomura *et al.* (1988). Briefly, embryos were fixed in 4% paraformaldehyde, dehydrated through alcohol and embedded in paraffin wax. Sections of 5–7  $\mu\text{m}$  were cut and floated onto polylysine-coated slides. They were then rehydrated, fixed in 4% paraformaldehyde, acetylated and dehydrated through alcohol. The slides were hybridized at 50°C for ~18 h in 50% formamide, 10% dextran sulphate, 8 mM-dithiothreitol (DTT), 300 mM-NaCl, 10 mM-Tris-HCl (pH 7.4), 5 mM-EDTA, 10 mM- $\text{Na}_2\text{HPO}_4$ , 1  $\times$  Denhardt's. After hybridization, coverslips were removed in 5  $\times$  SSC, 10 mM-DTT at 50°C. The slides were then washed at either 55°C or 65°C, in 2  $\times$  SSC, 100 mM-DTT, 50% formamide and, unless otherwise stated, were treated with RNase A (10–20  $\mu\text{g ml}^{-1}$ , 37°C, 30 min), followed by washes in 2  $\times$  SSC, and 0.1  $\times$  SSC at 65°C. Slides were then dehydrated, dipped in emulsion (Ilford K5, Knutsford, Cheshire, England) diluted 1:1 with 2% glycerol/water and exposed for 5–7 days at 4°C in the presence of desiccant. After standard development (Kodak D-19), the slides were counterstained with 0.2% toluidine blue and analyzed on a Zeiss Axiophot microscope using bright-field and dark-ground optics.

## Results

### Analysis of TGF $\beta$ 2 expression by *in situ* hybridization

Northern analysis of mouse embryo RNA has shown that TGF $\beta$ 2 is expressed during embryogenesis in a range of tissues (Miller *et al.* 1989). In order to more precisely define the cell types expressing TGF $\beta$ 2 mRNA, we hybridized sections of 13.5 days *p.c.* embryos to 3 days *p.p.* pups with a  $^{35}\text{S}$ -labelled single-stranded antisense riboprobe synthesized from a 929 b.p. human cDNA coding for a region of the precursor portion of TGF $\beta$ 2. (see Materials and methods). As a negative control, we used  $^{35}\text{S}$ -labelled sense strand riboprobe from the same TGF $\beta$ 2 cDNA. A radio-labelled antisense riboprobe for the 2ar (osteopontin or secreted phosphoprotein I) gene (Nomura *et al.* 1988) was used as a positive control in bone and as a negative control elsewhere. *In situ* hybridization demonstrates that TGF $\beta$ 2 is expressed in several different tissues including bone, cartilage, tendon, gut, placenta and blood vessels, as well as in both dermis and epidermis of the skin. Except for the epithelial localization in the skin, TGF $\beta$ 2 transcripts are found predominantly in cells of mesenchymal origin.

### TGF $\beta$ 2 RNA in the embryonic skeletal system

Bone is formed through either endochondral ossification (forming cartilage bone) or intramembranous ossification (forming membrane bone). Endochondral bone formation gives rise to the long bones of the limbs, the vertebral column, pelvis and base of the skull, while intramembranous ossification forms the bones of the skull, mandible and maxilla. Figs 1 and 2 suggest that TGF $\beta$ 2 is involved in both of these processes.

Sections of limbs of 13.5 days *p.c.* embryos through to 3 days *p.p.* pups were hybridized with radiolabelled antisense TGF $\beta$ 2 RNA. Although a positive signal could be detected at day 13.5 *p.c.* around the cartilage model of the bones (data not shown), highest levels were not seen until periosteal ossification was underway at about 15.5 days *p.c.* The high levels of TGF $\beta$ 2 transcripts in the long bones were maintained through 3 days *p.p.* Fig. 1A is a longitudinal section through a limb of a 15.5 days *p.c.* embryo. This demonstrates that TGF $\beta$ 2 RNA is found in both the central region of the developing bone as well as in the surrounding periosteal layer. Higher magnification (Fig. 1C,D) reveals that TGF $\beta$ 2 RNA is seen primarily in two cell types in the bones of the limb. In the central region of the diaphysis evacuated by the vascular bud, TGF $\beta$ 2 RNA is localized in large dark-staining cells adjacent to bone extracellular matrix as well as in long thin cells resembling endothelial cells (Fig. 1D). Due to their morphology and close association to the developing trabeculae, we presume the larger, dark-staining cells to be osteoblasts. Although red blood cells are seen near the longer thin cells, we cannot at this time definitively identify them as endothelial cells. The periosteum of developing bone consists of an outer layer of loose fibrous connective tissue and an inner layer of osteoblasts two to three cells thick. Fig. 1E shows that in the periosteum, TGF $\beta$ 2 RNA is found in the osteoblastic layer.

Fig. 2 is a sagittal section through the head of a 17.5 days *p.c.* embryo. The three areas indicated by the arrows demonstrate that TGF $\beta$ 2 expression occurs at the site of intramembranous ossification around the developing mandible, maxilla, and calvarium. Higher magnification of the cells in the maxilla expressing TGF $\beta$ 2 RNA reveals that they have the same morphology as the presumptive osteoblasts and endothelial-like cells that are seen in the central region of the bones of the forelimb (data not shown). In addition, TGF $\beta$ 2 RNA was localized to multinucleate osteoclasts in the central region of the bone near areas of matrix deposition (data not shown).

In embryonic cartilage, TGF $\beta$ 2 RNA transcripts are localized in the chondroblasts of the surrounding perichondrium and not in the hypertrophic, proliferating, or mature chondrocytes (Fig. 1F). A similar pattern of expression is also seen in the cartilage of the trachea, nasal turbinates and calvarium (data not shown).

TGF $\beta$ 2 RNA is also clearly expressed in the tendons of the embryonic limb. This is illustrated in Fig. 1G, which shows a tendon inserting into cartilage in the 15.5 days *p.c.* limb. TGF $\beta$ 2 RNA is localized throughout the



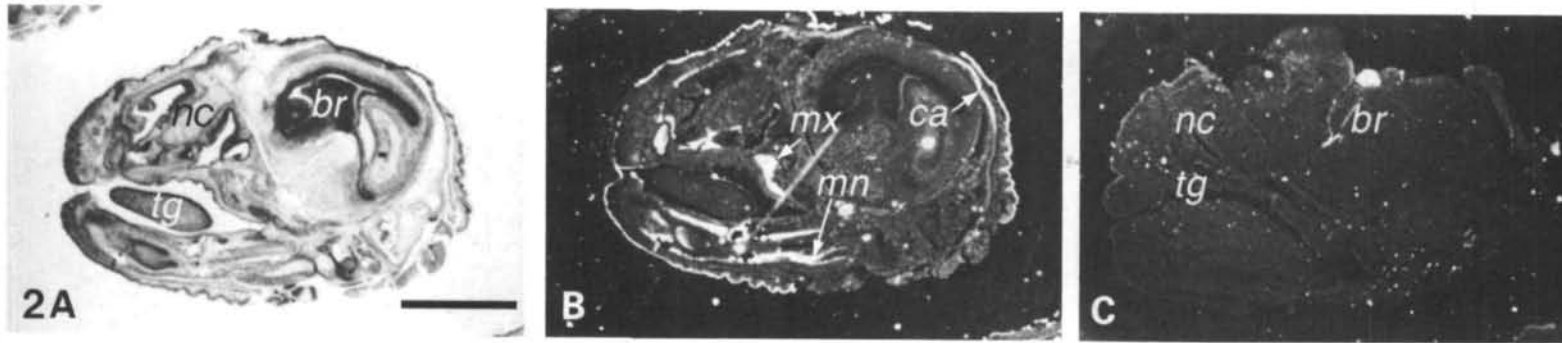

**Fig. 2.** Expression of  $TGF\beta 2$  RNA in the head of a 17.5 day *p.c.* mouse embryo as revealed by *in situ* hybridization. (A) Midsagittal section of a head, hybridized with antisense probe and photographed under bright-field illumination. Bar = 2 mm. (B) Same section as in A photographed under dark-ground illumination. Strong hybridization is seen in the intramembranous bone (arrows). The signal outlining the head is an edge artifact. (C) Control section through the same head, hybridized with the sense strand probe. Sections were exposed for 7 days. *br*, brain; *tg*, tongue; *nc*, nasal cavity; *mx*, maxilla; *mn*, mandible; *ca*, calvarium.

length of the tendon, in which the principal cell type is the fibroblast, but the expression abruptly declines upon the insertion of the tendon into the cartilage.

#### *TGFβ2* RNA in the embryonic digestive tract

The digestive tract is composed of many different cell types and contains four functionally distinct layers; the mucosa, submucosa, muscularis, and adventitia. While the mucosa is epithelial in origin, the submucosa is composed of mesenchymal cells which form a type of loose connective tissue.  $TGF\beta 2$  RNA is found in the submucosal layer of the embryonic esophagus, stomach, small intestine, and colon. Fig. 3B is a section through the small intestine of a 16.5 days *p.c.* embryo showing that, while strong hybridization is seen in the submucosa, no  $TGF\beta 2$  RNA was found in the other layers. The exact cell type expressing  $TGF\beta 2$  in the submucosa could not be positively identified. However, neither the small capillaries nor the lymphatic vessels that leave this layer and continue on through into the lamina propria of the villi express  $TGF\beta 2$  (Fig. 3A,B, arrows).

In addition to the expression seen in the submucosal layer,  $TGF\beta 2$  is localized to other tissues of the digestive tract (data not shown). The mesentery, which supports the gut, shows relatively high levels of  $TGF\beta 2$  RNA in cells of fibroblastic morphology. No  $TGF\beta 2$  RNA was detected in the embryonic liver parenchyma.

#### *TGFβ2* RNA in the embryonic respiratory tract

The lower respiratory tract consists of the trachea, the bronchiolar tree, and the alveoli.  $TGF\beta 2$  antisense probe hybridizes to the submucosal layer underlying the epithelial layer of the trachea, bronchi and larger bronchioles, but hybridization diminishes as the bronchioles grow smaller and finally disappears in the terminal bronchioles (Fig. 3D). In the alveoli, no specific  $TGF\beta 2$  hybridization is observed. Again, the small capillaries surrounding the alveoli are negative for  $TGF\beta 2$  RNA, indicating that these vessels do not express the gene.

#### *TGFβ2* RNA in the peripheral embryonic and extraembryonic circulatory system

The peripheral circulatory system consists of arteries, arterioles, capillaries, venules, and veins. Antisense  $TGF\beta 2$  probe hybridizes specifically to the cells surrounding larger rather than smaller blood vessels in several different organs including lung, liver, and kidney. Fig. 3D shows  $TGF\beta 2$  antisense probe hybridizing in the wall of a representative large, multilayered vessel in a 16.5 days *p.c.* embryo. Expression is seen in all layers of the vessel wall but are highest in the adventitial layer in the outermost segment of the wall and lowest in the strata containing smooth muscle. Once these vessels reach a size of about 2–3 RBC's in diameter,  $TGF\beta 2$  RNA is no longer detected. In the placenta, high levels of hybridization are seen in the extraembryonic mesoderm, which contains fetal blood vessels surrounded by fibroblastic tissue (Fig. 3E,F).

#### *TGFβ2* RNA in the skin

The two principal components of the skin are the epidermis, which is composed of epithelial cells, and the dermis, which is composed of cells of mesenchymal origin.  $TGF\beta 2$  RNA is expressed in both of these layers of the skin as illustrated in a series of sections of the limb at different stages of development. From days 13.5 to 14.5 *p.c.*, no  $TGF\beta 2$  expression was detected. On day 15.5 *p.c.*, the dermis begins to show strong hybridization with the  $TGF\beta 2$  antisense probe (Fig. 4B), but neither the hair follicles nor the epidermis show any hybridization at this time. This level of hybridization remains through day 16.5 *p.c.* On day 17.5 *p.c.*,  $TGF\beta 2$  expression in the dermis begins to dissipate but by day 18.5 *p.c.* expression appears in the suprabasal layer of the epidermis and in the hair follicles and remains at 3 days *p.p.* (Fig. 4E).

## Discussion

This study was undertaken to explore the possibility that  $TGF\beta 2$ , a member of the  $TGF\beta$  family, is involved

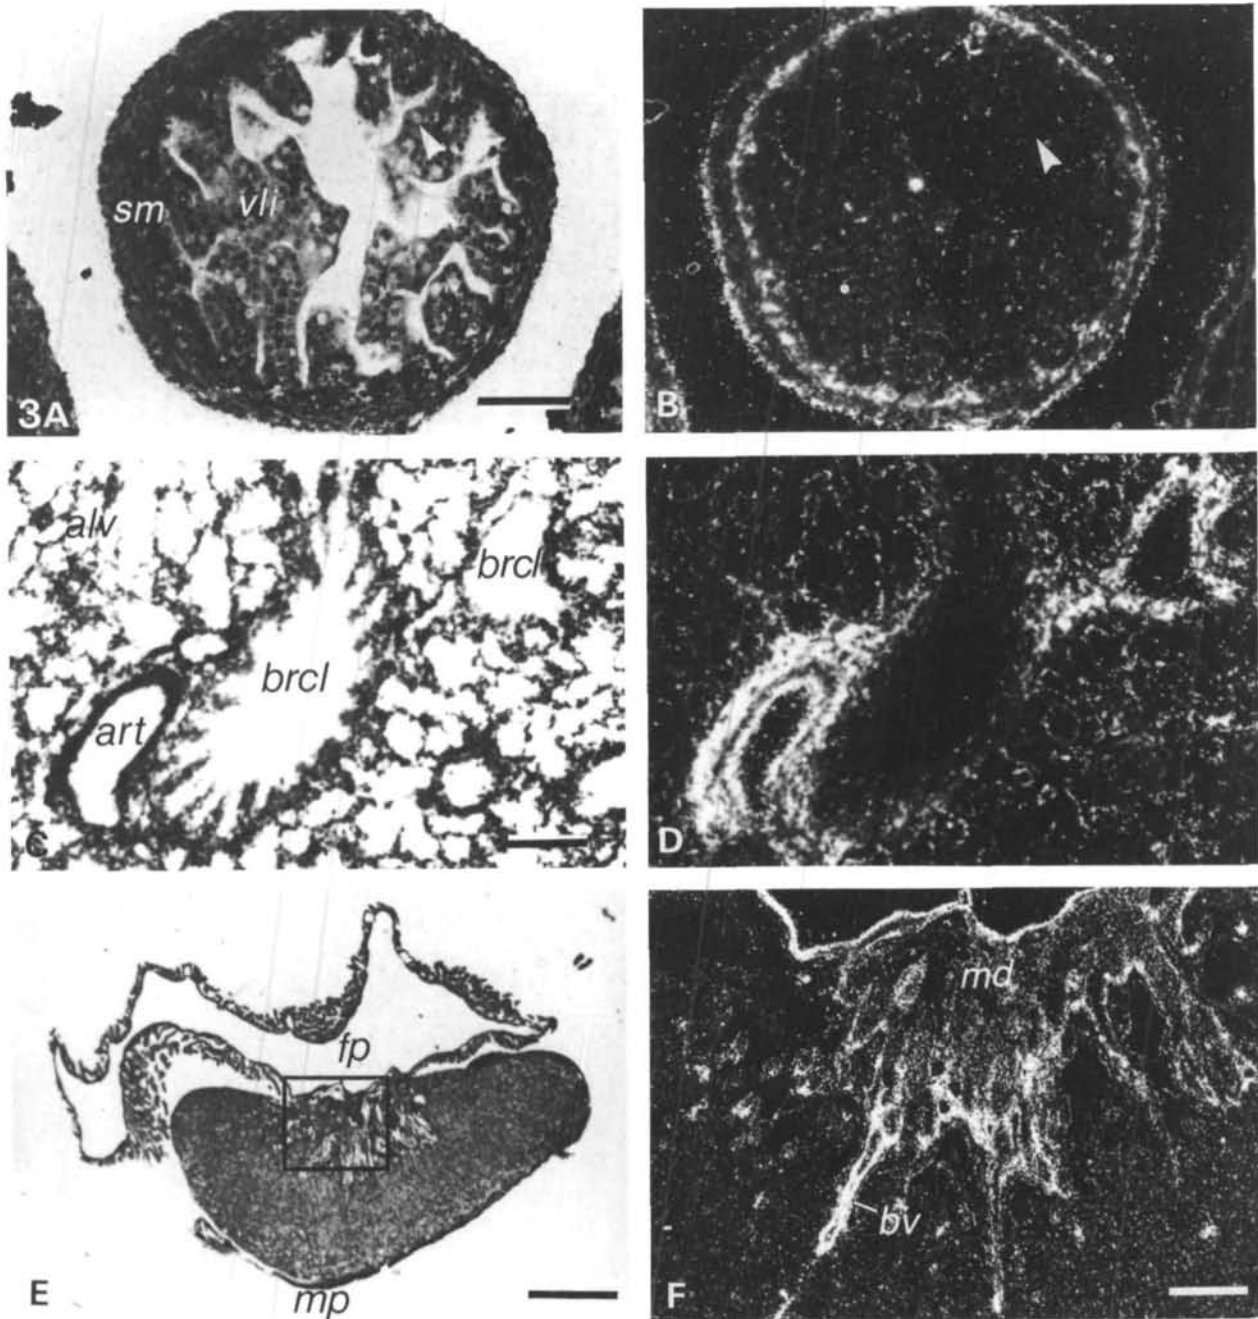

**Fig. 3.** Expression of TGF $\beta$ 2 RNA in the embryonic gut, and lung and 18.5 days *p.c.* placenta. (A) Section through the small intestine of a 16.5 days *p.c.* embryo hybridized with antisense probe and photographed under bright-field illumination. Bar = 100  $\mu$ m. (B) Same section as in A, photographed under dark-ground illumination. Strong hybridization is seen as a sharp band in the submucosal layer. The arrow demonstrates that the villi do not show hybridization. The signal on the periphery of the section is an edge artifact. (C) Section through the lung of a 16.5 days *p.c.* embryo hybridized with antisense probe and photographed under bright-field illumination. Bar = 100  $\mu$ m. (D) Same section as in C, photographed under dark-ground illumination. Strong TGF $\beta$ 2 signal is seen in the bronchioles and arterial wall but is absent from the alveoli. (Although it appears that only one bronchiole is expressing TGF $\beta$ 2 RNA, the left-most (larger) vessel also shows signal. However, due to the very high expression by the artery and other bronchiole, we were not able to obtain an appropriate exposure to illustrate this without overexposing these tissues). (E) Midsagittal section through the 18.5 days *p.c.* placenta probed with antisense probe and photographed under bright-field illumination. Bar = 1 mm. (F) Higher magnification of the same section (see box) as in E, photographed under dark-ground illumination. Intense signal is seen in blood vessels in the fetal placenta as well as in embryonic mesoderm. Bar = 250  $\mu$ m. Sections were exposed for 5–7 days. *vli*, villi; *sm*, submucosa; *art*, artery; *brcl*, bronchiole; *alv*, alveoli; *fp*, fetal placenta; *mp*, maternal placenta; *md*, mesoderm; *bv*, blood vessel.

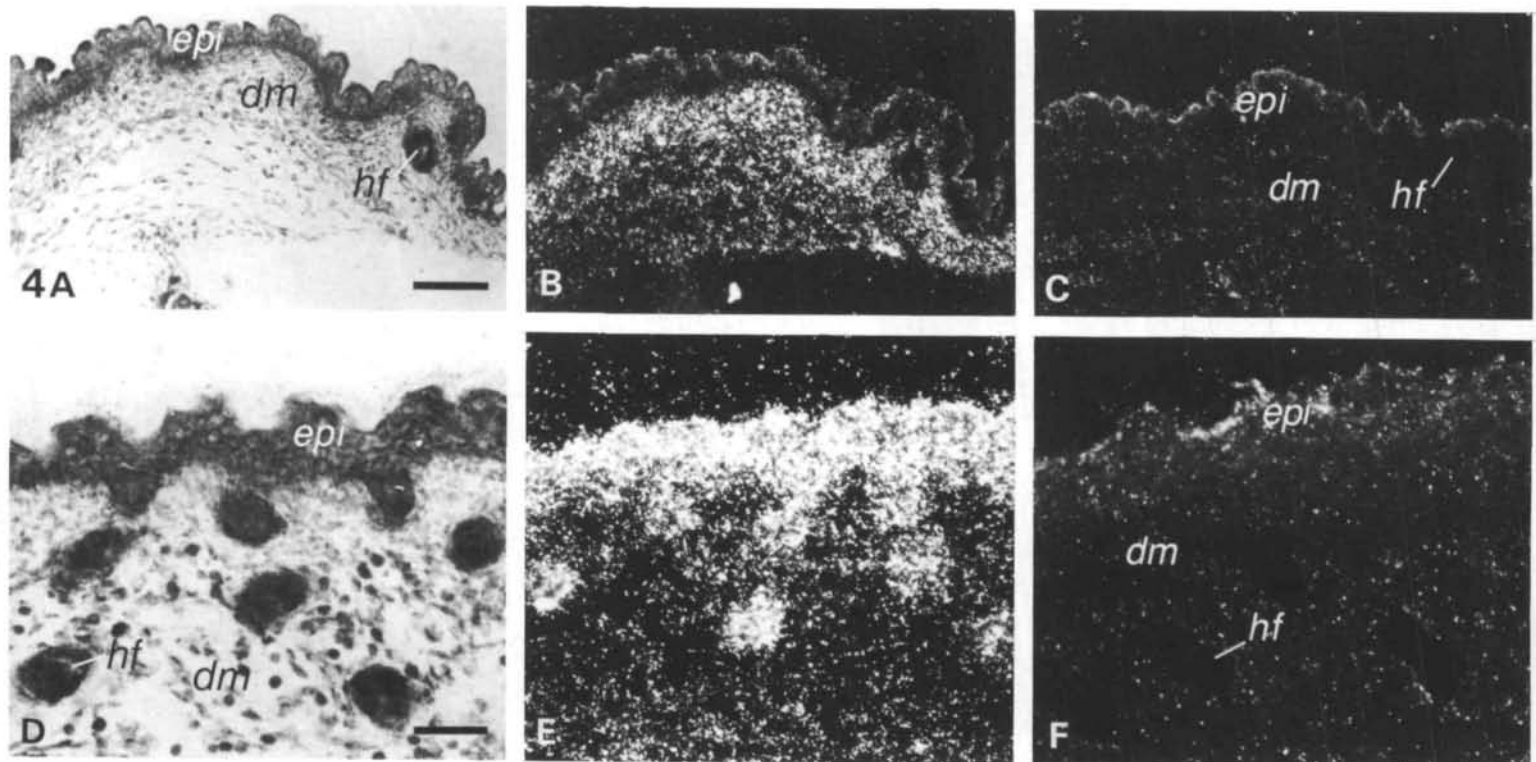

**Fig. 4.** Expression of TGF $\beta$ 2 RNA in the skin at two different stages of mouse development. (A) Section through the skin of a limb of a 15.5 days *p.c.* embryo hybridized with antisense probe and photographed under bright-field illumination. Bar = 100  $\mu$ m. (B) Same section as in A, photographed under dark-ground illumination. Strong hybridization is seen in the dermis but is absent in the epidermis and hair follicle. (C) Adjacent section to A, hybridized with the sense strand and photographed under dark-ground illumination. The apparent signal in the outermost region of the epidermis is an artifact due to light scattering by highly keratinized cells. (D) Section through the skin of a limb of an 18.5 days *p.c.* embryo hybridized with antisense probe and photographed under bright-field illumination. Bar = 50  $\mu$ m. (E) Same section as in D, photographed under dark-ground illumination. Strong signal is evident in the epidermis and hair follicles but is not seen in the dermis. (F) Adjacent section to D, probed with sense strand probe and photographed under dark-ground illumination. Again, the apparent signal at the edge of the epidermis is due to light scattering by keratinized cells. Sections were exposed 5 days. *epi*, epidermis; *dm*, dermis; *hf*, hair follicle.

in mammalian development. We have used *in situ* hybridization to localize TGF $\beta$ 2 RNA in mouse embryos ranging in age from 13.5 days *p.c.* to 3 days *p.p.* Our results clearly indicate that TGF $\beta$ 2 is expressed in a variety of organ systems in the embryo and that this expression is regulated in a spatial as well as temporal manner. Although TGF $\beta$ 2 RNA is seen in one epithelial cell type, the epidermis of the skin, the most common site of expression is in the cells of the mesenchyme. This is reminiscent of earlier observations by Lehnert and Akhurst in which TGF $\beta$ 1 RNA was found by *in situ* hybridization to be expressed in the mesenchymal component of several tissues in the mouse embryo (Lehnert & Akhurst, 1988). Although these investigators used a full-length murine TGF $\beta$ 1 cDNA probe, which included the mature region (which has a high level of sequence identity to the mature region of mTGF $\beta$ 2), they washed their sections at high stringency, thus minimizing the likelihood of cross-hybridization between their probe and TGF $\beta$ 2 mRNA. Our probe consisted of sequence in the precursor region of human TGF $\beta$ 2, which is very dissimilar to TGF $\beta$ 1 and TGF $\beta$ 3, and, in addition to this, our washing conditions

were stringent (see Materials and methods). Hence, the possibility of cross-hybridization of our probe with another RNA is also unlikely. The implication therefore is that TGF $\beta$ 1 RNA and TGF $\beta$ 2 RNA are expressed in many of the same or adjacent cells at the same time in development.

#### *Comparison of TGF $\beta$ 1 and TGF $\beta$ 2 in the developing mouse*

Previous studies by other investigators have shown that TGF $\beta$ 1 is expressed in the developing calvaria and long bones in both human (16 week) and murine (14.5 days *p.c.*) embryos (Sandberg *et al.* 1988*a,b*; Lehnert & Akhurst, 1988). TGF $\beta$ 1 mRNA has been localized to several different cell types in the embryonic bone including osteoblasts, osteocytes, and osteoclasts. Our data show that TGF $\beta$ 2 is also expressed in these cell types and, in addition, is found in chondroblasts and the fibroblasts of embryonic tendon. TGF $\beta$ 1 RNA has not been reported in tendon. Endochondral bone formation is a complex process in which a hyaline cartilage model of the bone is formed and then destroyed while being replaced by mineralized bone. The localization of



TGF $\beta$ 2 mRNA in several of the cell types involved in endochondral bone formation suggests that the protein is synthesized by these cells. There are several possible functions for this protein in developing cartilage and bone. Like TGF $\beta$ 1 it may 1) stimulate synthesis of matrix proteins by osteoblasts (Noda *et al.* 1988), 2) regulate differentiation of osteoblasts into osteocytes (Centrella *et al.* 1988) or 3) induce cartilage formation from mesenchymal precursors (Seyedin *et al.* 1986). There is some *in vitro* evidence supporting a role for TGF $\beta$ 2 in cartilage formation (Seyedin *et al.* 1987; Noda *et al.* 1988).

TGF $\beta$ 2 shows a complex pattern of expression in the embryonic skin in which the localization of TGF $\beta$ 2 RNA in the dermis precedes that of the epidermis. With the dissipation of the TGF $\beta$ 2 signal in the dermis, there is a corresponding increase in signal in the epidermis which is maintained at high levels until at least 3 days *post partum*. The expression in the epidermis is also seen in the developing hair follicles but only as they reach a mature state. This pattern of expression is in marked contrast to what has been reported for TGF $\beta$ 1 RNA by *in situ* hybridization analysis on mouse embryos (Lehnert & Akhurst, 1988). Although TGF $\beta$ 1 RNA has also been localized in developing hair follicles, it apparently declines as the follicle reaches a mature state and, while TGF $\beta$ 1 RNA is expressed in 'interfollicular' epidermis, it is seen only at low levels (Lehnert & Akhurst, 1988). Though no specific expression of TGF $\beta$ 1 RNA has been reported in the dermis, TGF $\beta$ 1 protein has been localized to the dermis by immunohistochemistry (Heine *et al.* 1987).

Throughout the embryo, TGF $\beta$ 2 RNA is expressed in the large vessels of the peripheral circulatory system. Vessels in the lung, liver, kidney, limb, and fetal placenta show strong hybridization to the TGF $\beta$ 2 antisense probe. Although embryonic vessels do not show all of the well-differentiated layers of adult vessels, the TGF $\beta$ 2 RNA appears to be expressed at high levels in the tunica adventitia and tunica intima and at lower levels in the tunica media. While TGF $\beta$ 1 RNA expression has been localized to the cardiac cushions of the embryonic heart, it has not been reported in any peripheral vessels, large or small (Lehnert & Akhurst, 1988).

TGF $\beta$ 2 RNA is expressed in the submucosal layer throughout the developing digestive and respiratory tracts. Our data show that TGF $\beta$ 2 transcripts are seen in the submucosa of the esophagus, stomach, small intestine, colon, trachea, bronchi, and bronchioles. TGF $\beta$ 1 RNA has been localized in the submucosal layer of the gut but has not been reported in the trachea or bronchioles (Lehnert & Akhurst, 1988). In addition, Lehnert & Akhurst report that TGF $\beta$ 1 is localized in the mesenchyme of the embryonic lung; however, we have seen TGF $\beta$ 2 expression only in the arteries and bronchiolar tree in this organ.

#### TGF $\beta$ 2 in mesenchymal-epithelial interactions

We report the localization of TGF $\beta$ 2 RNA in several areas of mesenchyme which are bounded by an adjacent

epithelium. The submucosa of the esophagus, gut, and respiratory tree, as well as the dermis of the skin all support an epithelial layer. Evidence exists that these two layers interact. This has been particularly well studied in the skin where the dermis (mesoderm) has profound effects on the development of the epithelium and can influence the growth and differentiation of cells in the epidermal layer (Wessels, 1977). In addition to being stimulatory to many mesodermally derived cell types, TGF $\beta$ 2 is a powerful inhibitor of epithelial cell proliferation and the high levels of expression of TGF $\beta$ 2 RNA by the cells of the mesenchyme raises the possibility that the submucosa may regulate the growth of the overlying epithelium in an autocrine or paracrine fashion through the production of this polypeptide. We have shown that TGF $\beta$ 2 RNA is expressed in the dermis of 15.5 and 16.5 days *p.c.* embryos when the overlying epidermis is only 3-4 cell layers thick. As development proceeds, the epidermis continues to thicken and hair follicles mature and the TGF $\beta$ 2 RNA expression in the dermis fades. Concomitant with the decrease of TGF $\beta$ 2 RNA in the dermis, there is the increase in the level of hybridizing RNA in the epidermis. By day 18.5 *p.c.*, the epidermis is 8-10 cell layers thick and has the appearance of fully developed skin. Strong hybridization in the epidermis is present at this stage and is still seen at 3 days *p.p.* Although definitive evidence is not yet available for the biological function of TGF $\beta$ 2 in this system, we propose a model in which this polypeptide is synthesized by the cells of the mesenchyme and stimulates their growth and differentiation in an autocrine fashion during periods when extracellular matrix production and angiogenesis are actively taking place within the dermis. Our model suggests that TGF $\beta$ 2 produced locally in the dermis has direct stimulatory effects on the proliferation and differentiation of mesenchymal cells and that these cells in turn produce factors (perhaps TGF $\alpha$ ) which directly stimulate proliferation and differentiation of the overlying epidermis. TGF $\beta$ 2 would thereby indirectly effect the epithelial cells in the epidermis. Once the epidermis has reached its mature state, expression of TGF $\beta$ 2 by the cells in the dermis wanes and expression in the epidermis is seen. The synthesis of this polypeptide by the cells in the epidermis would inhibit their further growth in an autocrine fashion (Shipley *et al.* 1986). This model for the mode of action of TGF $\beta$ 2 differs from the mechanism of TGF $\beta$ 1 action proposed by Lehnert and Akhurst who suggested that TGF $\beta$ 1 is made by cells in the epithelial component of an organ, is transferred to the underlying mesenchymal layer and acts through a paracrine fashion on the mesodermal cells (Lehnert & Akhurst, 1988). Our model is also consistent with a similar role for TGF $\beta$ 2 in the submucosa of the respiratory and digestive tracts as in the skin.

Although the use of Northern analysis and *in situ* hybridization reveal valuable information about the cells that synthesize TGF $\beta$ 2 mRNA, several important questions remain unanswered. For example, 1) which of the multiple TGF $\beta$ 2 transcripts (Webb *et al.* 1988;



Miller *et al.* 1989) are being synthesized, 2) do the cells which synthesize TGF $\beta$ 2 mRNA also make the protein, 3) is the secreted protein activated locally and 4) which cells have receptors for TGF $\beta$ 2? In future studies we hope to address some of the questions which we have now raised and, in addition, we would like to probe embryo sections of earlier developmental stages. In light of the reports that TGF $\beta$ 2 can induce mesoderm formation in the *Xenopus* embryo (Rosa *et al.* 1988), it would be of interest to examine mouse sections before and during gastrulation. The notion that a mammalian growth factor can induce mesoderm formation as well as alter cell behavior during morphogenesis could be of importance in furthering our understanding of embryonic development.

We thank Sofie Hashmi for excellent technical assistance and Ed Yang, Karen Lyons, Russette Lyons and Dr R. Davenport for helpful comments. We would also like to thank Dr A. Purchio for the hTGF $\beta$ 2 probe. R.W.P. was supported by NIH grant T32-GM07347 for the medical scientist training program (MSTP). H.L.M. was supported by NIH grant CA 42572.

## References

- ADAMSON, E. D., DELLER, M. J. & WARSHAW, J. B. (1981). Functional EGF receptors are present on mouse embryo tissues. *Nature, Lond.* **316**, 557–559.
- BARNARD, J. A., BASCOM, C. C., LYONS, R. M., SIPES, N. J. & MOSES, H. L. (1988). Transforming growth factor  $\beta$  in the control of epidermal proliferation. *Amer. J. Med. Sci.* **31**, 159–163.
- CATE, R. L., MATTALIANO, R. J., HESSON, C., TIZARD, R., FARBER, N. M., CHEUNG, A., NINFA, E. G., FREY, A. Z., GASH, D. J., CHOW, E. P., FISHER, R. A., BERTONIS, J. M., TORRES, G., WALLNER, B. P., RAMACHANDRAN, K. L., RAGIN, R. C., MANGANARO, T. F., MACLAUGHLIN, D. T. & DONAHOE, P. K. (1986). Isolation of the bovine and human genes for Müllerian inhibiting substance and expression of the human gene in animal cells. *Cell* **45**, 685–698.
- CENTRELLA, M., MCCARTHY, T. L. & CANALIS, E. (1988). Skeletal tissue and transforming growth factor  $\beta$  *FASEB J.* **2**, 3066–3073.
- COX, K. H., DELEON, D. V., ANGERER, L. M. & ANGERER, R. C. (1984). Detection of mRNAs in sea urchin embryos by *in situ* hybridization using asymmetric RNA probes. *Dev. Biol.* **101**, 485–502.
- DE MARTIN, R., HAENDLER, B., HOFER-WARBINEK, R., GAUGITSH, H., WRANN, M., SCHLUSENER, H., SEIFERT, J. M., BODMER, S., FONTANA, A. & HOFER, E. (1987). Complementary DNA for human glioblastoma-derived T cell suppressor factor, a novel member of the transforming growth factor- $\beta$  gene family. *EMBO J.* **6**, 3673–3677.
- D'ERCOLE, A. J., APPELWHITE, G. T. & UNDERWOOD, L. E. (1980). Evidence that somatomedin is synthesized by multiple tissues in the fetus. *Dev. Biol.* **75**, 315–328.
- DERYNCK, R., JARRET, J. A., CHEN, E. Y., EATON, D. H., BELL, J. R., ASSOIAN, R. K., ROBERTS, A. B., SPORN, M. B. & GOEDDEL, D. V. (1985). Human transforming growth factor- $\beta$  complementary DNA sequence and expression in normal and transformed cells. *Nature, Lond.* **316**, 701–705.
- DERYNCK, R., JARRET, J. A., CHEN, E. Y. & GOEDDEL, D. V. (1986). The murine transforming growth factor- $\beta$  precursor. *J. Biol. Chem.* **261**, 4377–4379.
- DERYNCK, R., LINDQUIST, P. B., LEE, A., WEN, D., TAMM, J., GRAYCAR, J. L., RHEE, L., MASON, A. J., MILLER, D. A., COFFEY, R. J., MOSES, H. L. & CHEN, E. Y. (1988). A new type of transforming growth factor- $\beta$ , TGF- $\beta$ 3. *EMBO J.* **7**, 3737–3743.
- GENTRY, L., LIOUBIN, M. N., PURCHIO, A. F. & MARQUARDT, H. (1988). Molecular events in the processing of recombinant type 1 pre-pro-transforming growth factor  $\beta$  to mature polypeptide. *Mol. cell. Biol.* **8**, 4162–4168.
- GREENWALD, I. (1985). *lin-12*, a nematode homeotic gene, is homologous to a set of mammalian proteins that includes epidermal growth factor. *Cell* **43**, 583–590.
- HANKS, S. K., ARMOUR, R., BALDWIN, J. H., MALDONADO, F., SPIESS, J. & HOLLEY, R. W. (1988). Amino acid sequence of the BSC-1 cell growth inhibitor (polyergin) deduced from the nucleotide sequence of the cDNA. *Proc. natn. Acad. Sci. U.S.A.* **85**, 79–82.
- HEATH, J. K. & SHI, W.-K. (1986). Developmentally regulated expression of insulin-like growth factors by differentiated murine teratocarcinomas and extraembryonic mesoderm. *J. Embryol. exp. Morph.* **95**, 193–212.
- HEINE, U. I., MUNOZ, E. F., FLANDERS, K. C., ELLINGSWORTH, L. R., LAM, H.-Y. P., THOMPSON, N. L., ROBERTS, A. B. & SPORN, M. B. (1987). Role of transforming growth factor- $\beta$  in the development of the mouse embryo. *J. Cell Biol.* **105**, 2861–2876.
- HOGAN, B. L. M., CONSTANTINI, F. & LACY, E. (1986). *Manipulating the Mouse Embryo. A Laboratory Manual*. Cold Spring Harbor, New York: Cold Spring Harbor Laboratory.
- HOLLEY, R. W., ARMOUR, R., BALDWIN, J. H. & GREENFIELD, S. (1983). Activity of a kidney epithelial cell growth inhibitor on lung and mammary cells. *Cell Biol. Int. Rep.* **7**, 141–147.
- HOLLEY, R. W., BOHLEN, P., FAVA, R., BALDWIN, J. H., KLEEMAN, G. & ARMOUR, R. (1980). Purification of kidney epithelial cell growth inhibitors. *Proc. natn. Acad. Sci. U.S.A.* **77**, 5989–5992.
- IKEDA, T., LIOUBIN, M. N. & MARQUARDT, H. (1987). Human transforming growth factor type  $\beta$ 2: Production by a prostatic adenocarcinoma cell line, purification, and initial characterization. *Biochem.* **26**, 2406–2410.
- JAKOBOVITS, A., SHACKLEFORD, G. M., VARMUS, H. E. & MARTIN, G. R. (1986). Two proto-oncogenes implicated in mammary carcinogenesis, *int-1* and *int-2*, are independently regulated during mouse development. *Proc. natn. Acad. Sci. U.S.A.* **83**, 7806–7810.
- JAKOWLEW, S. B., DILLARD, P. J., KONDAIAH, P., SPORN, M. B. & ROBERTS, A. B. (1988a). Complementary deoxyribonucleic acid cloning of a novel transforming growth factor- $\beta$  messenger ribonucleic acid from chick embryo chondrocytes. *Mol. Endo.* **2**, 747–755.
- JAKOWLEW, S. B., DILLARD, P., SPORN, M. B. & ROBERTS, A. B. (1988b). Complementary deoxyribonucleic acid cloning of a messenger ribonucleic acid encoding transforming growth factor  $\beta$ 4 from chicken embryo chondrocytes. *Mol. End.* **2**, 1186–1195.
- KIMELMAN, D. & KIRSCHNER, M. (1987). Synergistic induction of mesoderm by FGF and TGF- $\beta$  and the identification of an mRNA coding for FGF in the early *Xenopus* embryo. *Cell* **51**, 869–877.
- KNÖCHEL, W., BORN, J., HOPPE, P., LOPPNOW-BLINDE, B., TIEDEMANN, H., TIEDEMAN, H., MCKEEHAN, W. L. & GRUNZ, H. (1987). Mesoderm-inducing factors. *Naturwissenschaften* **74**, 604–606.
- KNUST, E., DIETRICH, U., TEPASS, U., BRENNER, K. A., WEIGEL, D., VASSIN, H. & CAMPOS-ORTEGA, J. A. (1987). EGF homologous sequences encoded in the genome of *Drosophila melanogaster* and their relation to neurogenic genes. *EMBO J.* **6**, 761–766.
- LEHNERT, S. A. & AKHURST, R. J. (1988). Embryonic expression pattern of TGF beta type-1 RNA suggests both paracrine and autocrine mechanisms of action. *Development* **104**, 263–273.
- LYONS, R. M., GRAYCAR, J. L., LEE, A., HASHMI, S., LINDQUIST, P. B., CHEN, E. Y., HOGAN, B. L. M. & DERYNCK, R. (1989). Vgr-1, a mammalian gene related to *Xenopus vg-1* and a new member of the TGF $\beta$  gene superfamily. *Proc. natn. Acad. Sci. U.S.A.* (in press).
- LYONS, R. M., GENTRY, L. E., PURCHIO, A. F. & MOSES, H. L. (1989). Mechanism of activation of latent recombinant transforming growth factor  $\beta$ 1 by plasmin. (submitted).
- LYONS, R. M., KESKI-OJA, J. & MOSES, H. L. (1988). Proteolytic activation of latent transforming factor- $\beta$  from fibroblast conditioned medium. *J. Cell Biol.* **106**, 1659–1665.

- MADISEN, L., WEBB, N. R., ROSE, T. M., MARQUARDT, H., IKEDA, T., TWARDZIK, D., SEYEDIN, S. & PURCHIO, A. F. (1988). Transforming growth factor- $\beta$ 2: cDNA cloning and sequence analysis. *DNA* 7, 1-8.
- MARQUARDT, H., LIUBIN, M. & IKEDA, T. (1987). Complete amino acid sequence of human transforming growth factor  $\beta$ 2. *J. Biol. Chem.* 262, 12 127-12 131.
- MASON, A. J., HAYFLICK, J. S., LING, N. L., ESCH, F., UENO, N., YING, S.-Y., GUILLEMIN, R., NIALI, H. & SEEBURG, P. H. (1985). Complementary DNA sequences of ovarian follicular fluid inhibin show precursor structure and homology with transforming growth factor-B. *Nature, Lond.* 318, 659-663.
- MASSAGUÉ, J. (1987). The TGF- $\beta$  family of growth and differentiation factors. *Cell* 49, 437-438.
- MILLER, D. A., LEE, A., PELTON, R. W., CHEN, E. Y., MOSES, H. L. & DERYNCK, R. (1989). Murine transforming growth factor- $\beta$ 2 cDNA sequence and expression in adult tissues and embryos. *Mol. Endo.* (in press).
- MOSES, A. C., NISSLEY, S. P., SHORT, P. A., RECHLER, M. M., WHITE, R. M., KNIGHT, A. B. & HIGA, O. Z. (1980). Elevated levels of multiplication-stimulating activity, an insulin-like growth factor, in fetal rat serum. *Proc. natn. Acad. Sci. U.S.A.* 77, 3649-3653.
- NEXO, E., HOLLENBERG, M. D., FIGUEROA, A. & PRATT (1980). Detection of epidermal growth factor-urogastrone and its receptor during fetal mouse development. *Proc. natn. Acad. Sci. U.S.A.* 77, 2782-2785.
- NODA, M., TOON, K., PRINCE, C. W., BUTLER, W. T. & RODAN, G. A. (1988). Transcriptional regulation of osteopontin production in rat osteosarcoma cells by type  $\beta$  transforming growth factor. *J. Biol. Chem.* 263, 13 916-13 921.
- NOMURA, S., WILLS, A. J., EDWARDS, D. R., HEATH, J. K. & HOGAN, B. L. M. (1988). Developmental expression of 2ar (osteopontin) and SPARC (osteonectin) RNA as revealed by *in situ* hybridization. *J. Cell Biol.* 106, 441-450.
- PADGETT, R. W., ST JOHNSON, R. D. & GELBART, W. M. (1987). A transcript from a *Drosophila* pattern gene predicts a protein homologous to the transforming growth factor-B gene family. *Nature, Lond.* 325, 81-84.
- PFELSHIFTER, J. & MUNDY, G. R. (1987). Modulation of type  $\beta$  transforming factor activity in bone cultures by osteotropic hormones. *Proc. natn. Acad. Sci. U.S.A.* 84, 2024-2028.
- PROPER, J. A., BJORNSON, C. L. & MOSES, H. L. (1982). Mouse embryos contain polypeptide growth factors capable of inducing a reversible neoplastic phenotype in non-transformed cells in culture. *J. cell. Physiol.* 110, 169-174.
- RIZZINO, A. (1987). Appearance of high affinity receptors for type  $\beta$  transforming growth factor during differentiation of murine embryonal carcinoma cells. *Cancer Res.* 47, 4386-4390.
- RIZZINO, A. (1988). Transforming growth factor- $\beta$ : Multiple effects on cell differentiation and extracellular matrices. *Devl Biol.* 130, 411-422.
- ROSA, F., ROBERTS, A. B., DANIELPOUR, D., DART, L. L., SPORN, M. B. & DAWID, I. B. (1988). Mesoderm induction in amphibians: The role of TGF- $\beta$ 2-like factors. *Science* 239, 783-785.
- SANDBERG, M., AUTIO-HARMAINEN, H. & VUORIO, E. (1988b). Localization of the expression of types I, III, and IV collagen, TGF- $\beta$ 1 and c-fos genes in developing human calvarial bones. *Devl Biol.* 130, 324-334.
- SANDBERG, M., VUORIO, T., HIRROVAN, H., ALITALO, K. & VUORIO, E. (1988a). Enhanced expression of TGF- $\beta$  and c-fos mRNAs in the growth plates of developing human long bones. *Development* 102, 461-470.
- SEYEDIN, S. M., SEGARINI, P. R., ROSEN, D. M., THOMPSON, A. Y., BENTZ, H. & GRAYCAR, J. (1987). Cartilage-inducing factor-B is a unique protein structurally and functionally related to transforming factor- $\beta$ . *J. Biol. Chem.* 262, 1946-1949.
- SEYEDIN, S. M., THOMPSON, A. Y., BENTZ, H., ROZEN, D. M., MCPHERSON, J. M., CONTI, A., SIEGEL, N. R., GALLUPI, G. R. & PIEZ, K. A. (1986). Cartilage-inducing factor-A: Apparent identity to transforming factor- $\beta$ . *J. Biol. Chem.* 261, 5693-5695.
- SHIPLEY, G. D., PITTELKOW, M. R., WILLE, J. J., SCOTT, R. E. & MOSES, H. L. (1986). Reversible inhibition of normal human prokeratinocyte proliferation by type  $\beta$  transforming growth factor-growth inhibitor in serum-free medium. *Cancer Res.* 46, 2068-2071.
- SMITH, E. P., SADLER, T. W. & D'ERCOLE, A. J. (1987). Somatomedins/insulin-like growth factors, their receptors and binding proteins are present during mouse embryogenesis. *Development* 101, 73-82.
- SMITH, J. C. (1987). A mesoderm-inducing factor is produced by a *Xenopus* cell line. *Development* 99, 3-14.
- SMITH, J. C. (1989). Mesoderm induction and mesoderm-inducing factors in early amphibian development. *Development* 105, 1-13.
- SPORN, M. B., ROBERTS, A. B., WAKEFIELD, L. M. & DE CROMBRUGGHE, B. (1987). Some recent advances in the chemistry and biology of transforming growth factor-beta. *J. Cell Biol.* 105, 1039-1045.
- TEN DUJKE, P., HANSEN, P., IWATA, K. K., PIELER, C. & FOULKES, J. G. (1988). Identification of another member of the transforming growth factor type  $\beta$  gene family. *Proc. natn. Acad. Sci. U.S.A.* 85, 4715-4719.
- TUCKER, R. F., SHIPLEY, G. D., MOSES, H. L. & HOLLEY, R. W. (1984). Growth inhibitor from BSC-1 cells closely related to platelet type  $\beta$  transforming growth factor. *Science* 226, 705-707.
- TWARDZIK, D. R. (1985). Differential expression of transforming growth factor-a during prenatal development of the mouse. *Cancer Res.* 45, 5413-5416.
- TWARDZIK, D. R., RANCHALIS, J. R. & TODARO, G. J. (1982). Mouse embryos contain transforming growth factors related to those isolated from tumor cells. *Cancer Res.* 42, 590-593.
- WEBB, N. R., MADISEN, L., ROSE, T. M. & PURCHIO, A. F. (1988). Structural and sequence analysis of TGF- $\beta$ 2 cDNA clones predicts two precursor proteins produced by alternative mRNA splicing. *DNA* 7, 493-497.
- WEEKS, D. L. & MELTON, D. A. (1987). A maternal mRNA localised to the vegetal hemisphere in *Xenopus* eggs codes for a growth factor related to TGF- $\beta$ . *Cell* 51, 861-867.
- WESSELS, N. K. (1977). *Tissue Interactions and Development*. Calif. USA: W.A. Benjamin.
- WHARTON, K. A., JOHANSEN, K. M., XU, T. & ARTAVONIS-TSAKONIS, S. (1985). Nucleotide sequence from the neurogenic locus *notch* implies a gene product that shares homology with proteins containing EGF-like repeats. *Cell* 43, 567-581.
- WILCOX, J. N. & DERYNCK, R. (1988). Developmental expression of transforming growth factors alpha and beta in mouse fetus. *Mol. cell. Biol.* 8, 3415-3422.
- WOZNEY, J. M., ROSEN, V., CELESTE, A. J., MITSOCK, L. M., WHITTERS, M. J., KRIZ, R. W., HEWICK, R. M. & WANG, E. A. (1988). Novel regulators of bone formation: Molecular clones and activities. *Science* 242, 1528-1534.
- WRANN, M., BODMER, S., DE MARTIN, R., SIEPEL, C., HOFER-WARBINEK, R., FREI, K., HOFER, E. & FONTANA, A. (1987). T cell suppressor factor from human glioblastoma cells is a 12.5-kd protein closely related to transforming growth factor- $\beta$ . *EMBO J.* 6, 1633-1636.

(Accepted 2 May 1989)
